# Supplementary material for: Exploration of structure sensitivity of gold nanoparticles in low-temperature CO oxidation
Source: Royal Society of Chemistry journal article supplement (doi:10.1039/d3im00117b), 2023-11-27
Supplement: d3im00117b1.pdf [file d3im00117b1.pdf]

## Exploration of structure sensitivity of gold nanoparticles in low-temperature CO oxidation

Lei Ying,<sup>ab</sup> Yu Han,<sup>ab</sup> Beien Zhu,<sup>\*ac</sup> and Yi Gao<sup>\*acd</sup>

<sup>a</sup>. Key Laboratory of Interfacial Physics and Technology, Shanghai Institute of Applied Physics, Chinese Academy of Sciences, Shanghai 201800, China.

<sup>b</sup>. University of Chinese Academy of Sciences, Beijing 100049, China.

<sup>c</sup>. Phonon Science Research Center for Carbon Dioxide, Shanghai Advanced Research Institute, Chinese Academy of Sciences, Shanghai 201210, China.

<sup>d</sup>. Key Laboratory of Low-Carbon Conversion Science & Engineering, Shanghai Advanced Research Institute, Chinese Academy of Sciences, Shanghai 201210, China

\*Corresponding author. Email: gaoyi@sari.ac.cn (Y.G.); zhube@sari.ac.cn (B.Z.).

Keywords: Kinetic Monte Carlo; CO oxidation; Gold catalysis; Nanoparticles

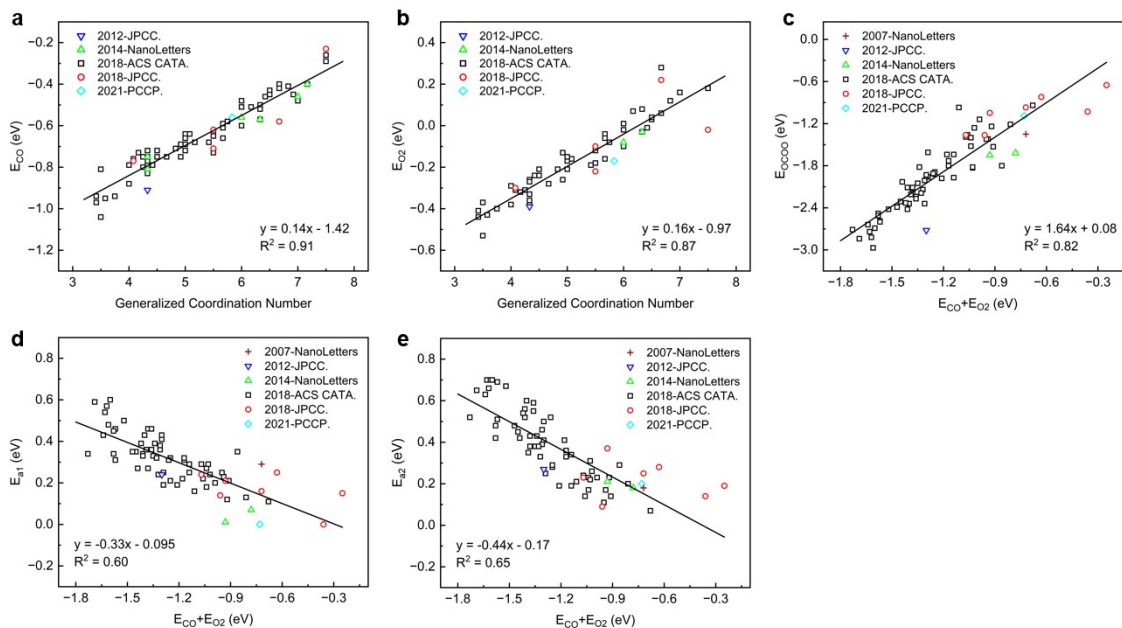

**Fig. S1** Adsorption energies versus generalized coordination number for CO (a) and O<sub>2</sub> (b). The scaling of the OCOO adsorption energy (c), activation energy for  $[CO^* + O_2^* \rightleftharpoons OCOO^*]$  reaction (d), activation energy for  $[OCOO^* \rightarrow CO_2(g) + O^* + *]$  reaction (e) with the sum of the CO and O adsorption energies. The data are collected from Refs. [1–6].

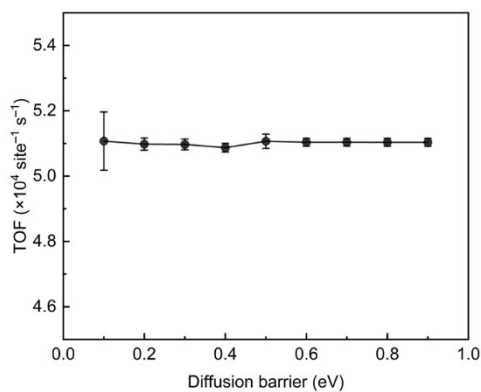

**Fig. S2** TOFs with different diffusion barrier at 273 K with  $P_{O_2}/P_{CO} = 1$ . Error bars are the standard deviation of 10 identical simulations.

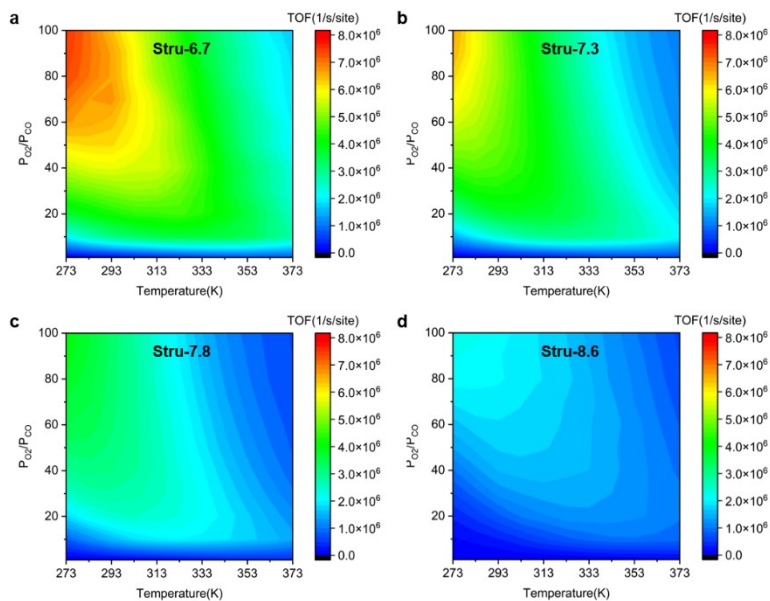

**Fig. S3** Contour plot of TOFs for 5 nm Au NPs with  $\bar{CN} = 6.7$  (a), 7.3 (b), 7.8 (c), and 8.6 (d) changing with the temperature and partial pressure ratio ( $P_{\text{total}} = 1$  bar).

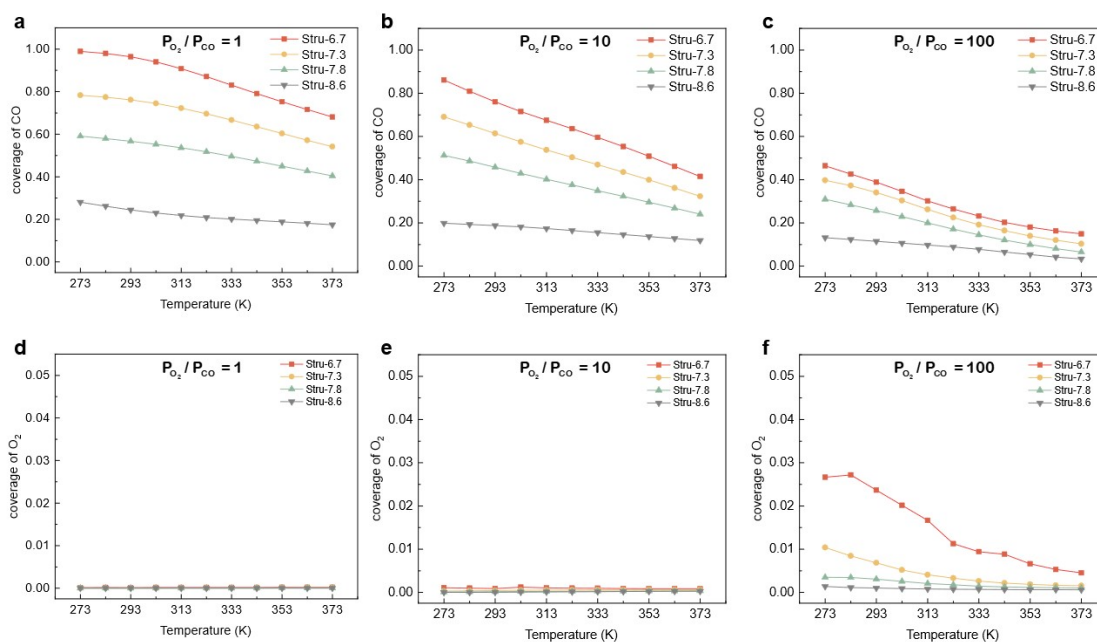

**Fig. S4** Coverage of CO and O<sub>2</sub> as a function of temperature at  $P_{\text{total}} = 1$  bar with  $P_{O_2}/P_{CO} = 1$  (a, d), 10 (b, e), and 100 (c, f) for Au NPs with different  $\bar{CN}$

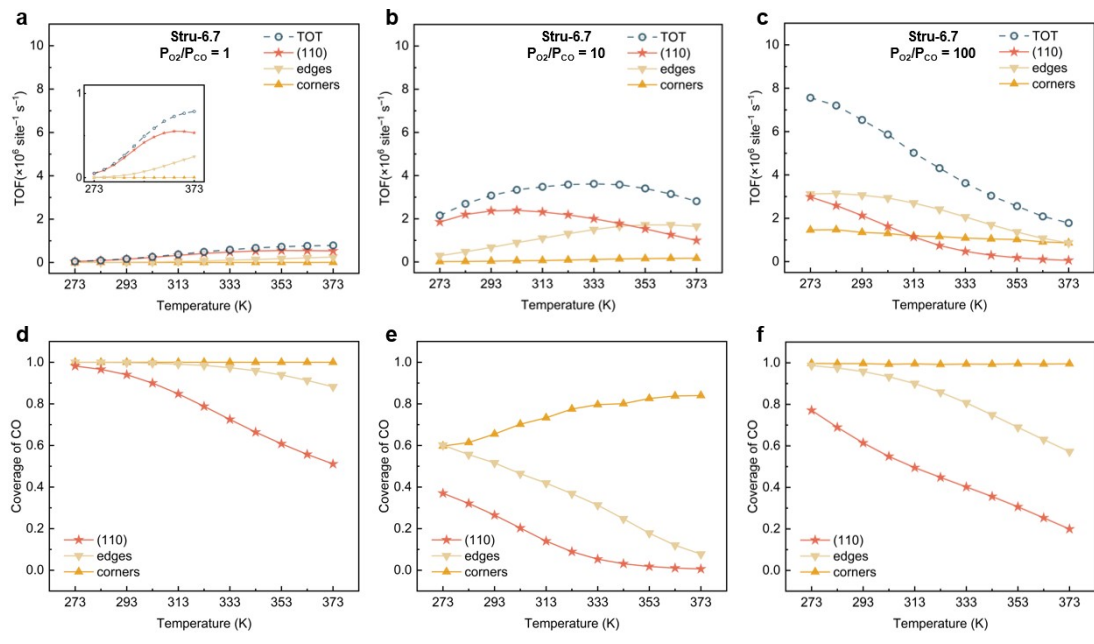

**Fig. S5** site-specific contributions to TOFs and coverages of CO for Au NPs with Stru-6.7 under

$$P_{O_2}/P_{CO} = 1 \text{ (a, d), } 10 \text{ (b, e), and } 100 \text{ (c, f).}$$

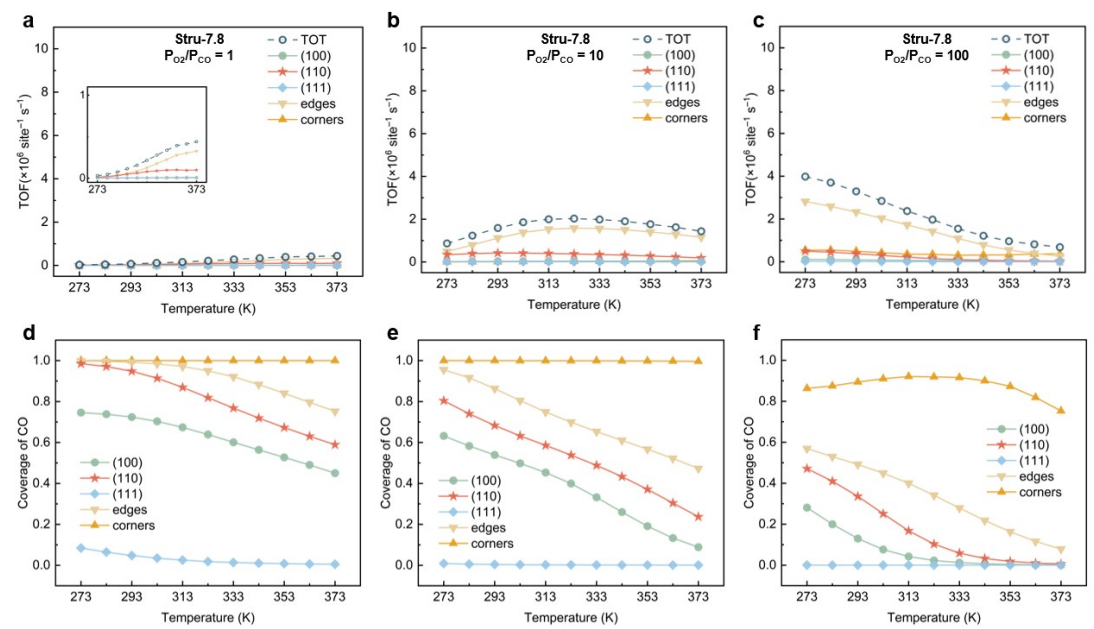

**Fig. S6** site-specific contributions to TOFs and coverages of CO for Au NPs with Stru-7.8 under

$$P_{O_2}/P_{CO} = 1 \text{ (a, d), } 10 \text{ (b, e), and } 100 \text{ (c, f).}$$

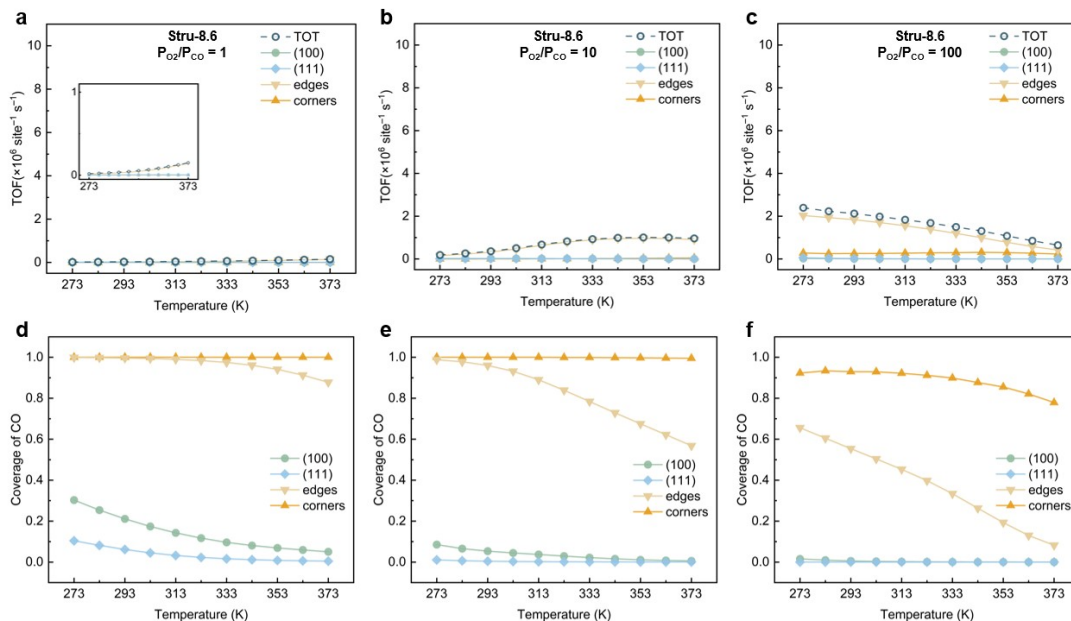

**Fig. S7** site-specific contributions to TOFs and coverages of CO for Au NPs with Stru-8.6 under

$$P_{O_2}/P_{CO} = 1 \text{ (a, d), } 10 \text{ (b, e), and } 100 \text{ (c, f).}$$

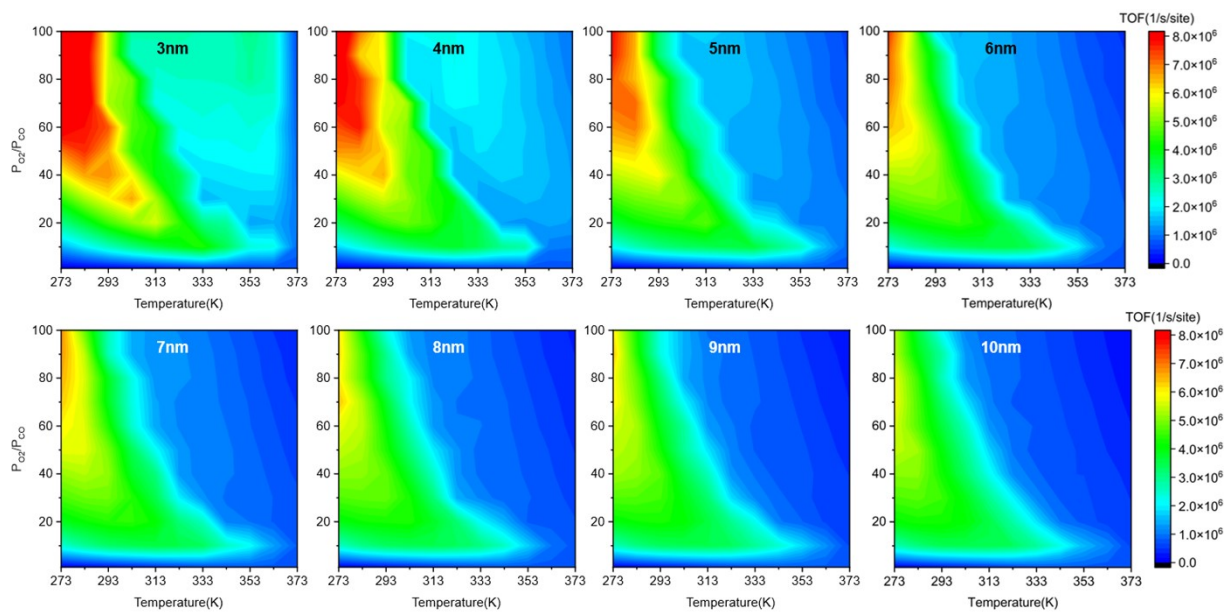

**Fig. S8** Contour plot of TOFs for Au NPs changing with the temperature and partial pressure

ratio ( $P_{total} = 1$  bar) in the size range of 3-10 nm.

**Table S1.** Surface tension under vacuum (Units in eV/Å<sup>2</sup>) and adsorption energies (Units in eV)

|         | $\gamma_{hkl}$ | $E_{CO}$ | $E_{O_2}$ | $E_O$ | $E_{OCO_0}$ |
|---------|----------------|----------|-----------|-------|-------------|
| Au(100) | 0.055          | -0.48    | -0.02     | 0.06  | -0.76       |
| Au(110) | 0.056          | -0.55    | -0.08     | 0.03  | -0.91       |
| Au(111) | 0.043          | -0.22    | -0.01     | 0.00  | -0.77       |

**Table S2.** Lateral interaction between A\* and B\* (Units in eV)<sup>α</sup>

| A*             | B*                 | Au(100) | Au(110) | Au(111) | Average |
|----------------|--------------------|---------|---------|---------|---------|
| CO             | CO                 | -0.12   | -0.08   | -0.08   | -0.09   |
|                | O <sub>2</sub>     | -0.02   | -0.02   | -0.00   | -0.01   |
|                | O                  | -0.12   | -0.18   | -0.08   | -0.13   |
|                | OCOOC <sub>C</sub> | -0.02   | 0.01    | -0.00   | -0.00   |
|                | OCOOC <sub>O</sub> | -0.02   | 0.04    | -0.00   | 0.01    |
| O <sub>2</sub> | O <sub>2</sub>     | -0.03   | -0.04   | -0.03   | -0.03   |
|                | O                  | -0.16   | -0.26   | -0.12   | -0.18   |
|                | OCOOC <sub>C</sub> | -0.00   | -0.02   | 0.00    | -0.00   |
|                | OCOOC <sub>O</sub> | -0.00   | -0.03   | -0.19   | -0.07   |
| O              | O                  | -0.18   | -0.14   | -0.21   | -0.18   |
|                | OCOOC <sub>C</sub> | -0.06   | -0.06   | -0.11   | -0.08   |
|                | OCOOC <sub>O</sub> | -0.07   | -0.05   | -0.07   | -0.06   |

<sup>α</sup>OCOOC<sub>C</sub> means the O-C- side of OCOO\*, and OCOOC<sub>O</sub> means O-O- side.

## References

- 1 W. An, Y. Pei and X. C. Zeng, CO oxidation catalyzed by single-walled helical gold nanotube, *Nano Lett.*, 2007, **8**, 195–202.
- 2 H. Li, L. Li, A. Pedersen, Y. Gao, N. Khetrpal, H. Jónsson and X. C. Zeng, Magic-number gold nanoclusters with diameters from 1 to 3.5 nm: Relative stability and catalytic activity for CO oxidation, *Nano Lett.*, 2014, **15**, 682–688.
- 3 H. Li and J. Ho, Theoretical calculations on the oxidation of CO on Au<sub>55</sub>, Ag<sub>13</sub>Au<sub>42</sub>, Au<sub>13</sub>Ag<sub>42</sub>, and Ag<sub>55</sub> clusters of nanometer size, *J. Phys. Chem. C*, 2012, **116**, 13196–13201.
- 4 H. Xu, D. Cheng, Y. Gao and X. C. Zeng, Assessment of catalytic activities of gold nanoclusters with simple structure descriptors, *ACS Catal.*, 2018, **8**, 9702–9710.
- 5 J.-X. Liu, I. A. W. Filot, Y. Su, B. Zijlstra and E. J. M. Hensen, Optimum particle size for gold-catalyzed CO oxidation, *J. Phys. Chem. C*, 2018, **122**, 8327–8340.
- 6 J. L. C. Fajín, A. S. Moura and M. N. D. S. Cordeiro, First-principles-based kinetic Monte Carlo simulations of CO oxidation on catalytic Au(110) and Ag(110) surfaces, *Phys. Chem. Chem. Phys.*, 2021, **23**, 14037–14050.
